# Supplementary material for: Synthesis and characterization of single-crystalline graphitic C3N4 nanocones
Source: Royal Society of Chemistry journal article supplement (doi:10.1039/c4ce02091j), 2014-11-10
Supplement: c4ce02091j1.pdf [file c4ce02091j1.pdf]

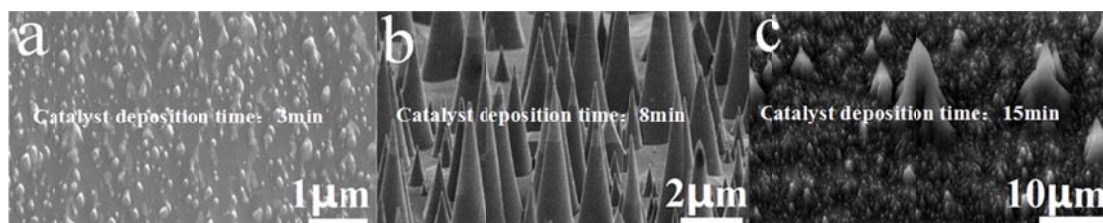

Fig. S1

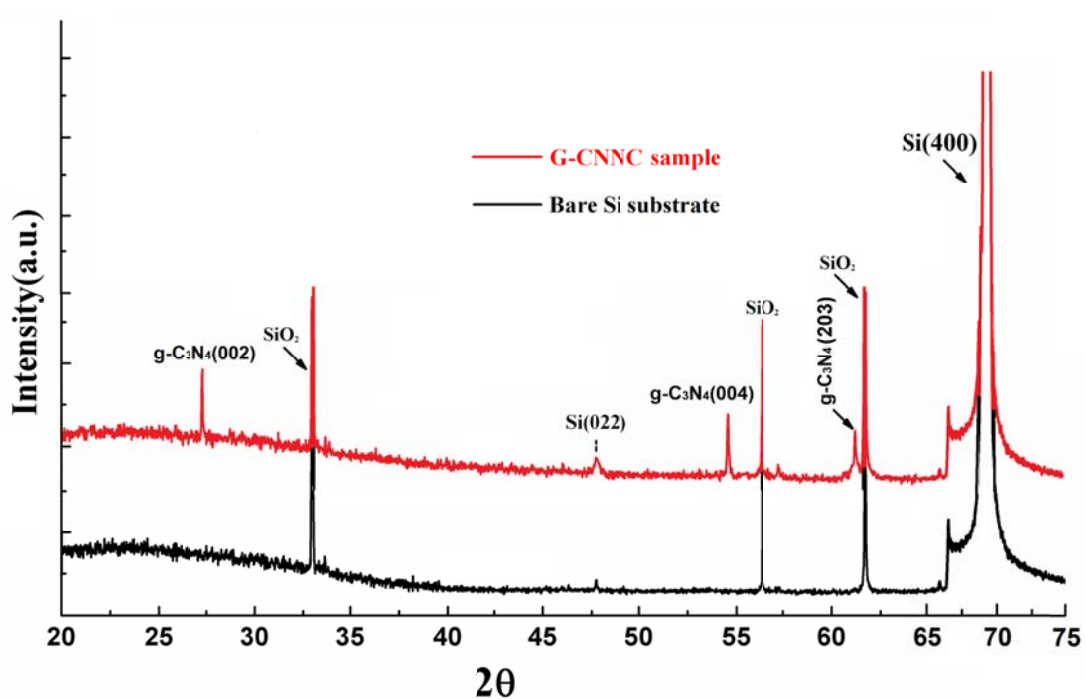

Fig. S2

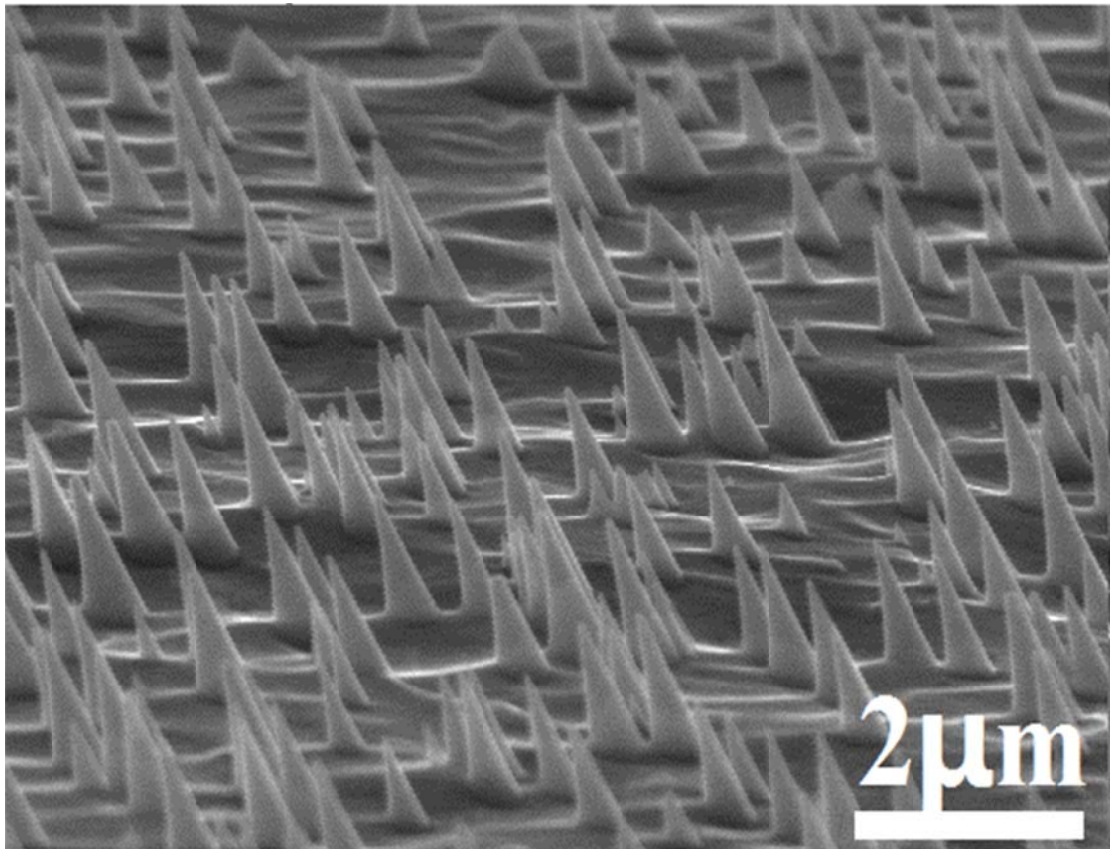

Fig. S3

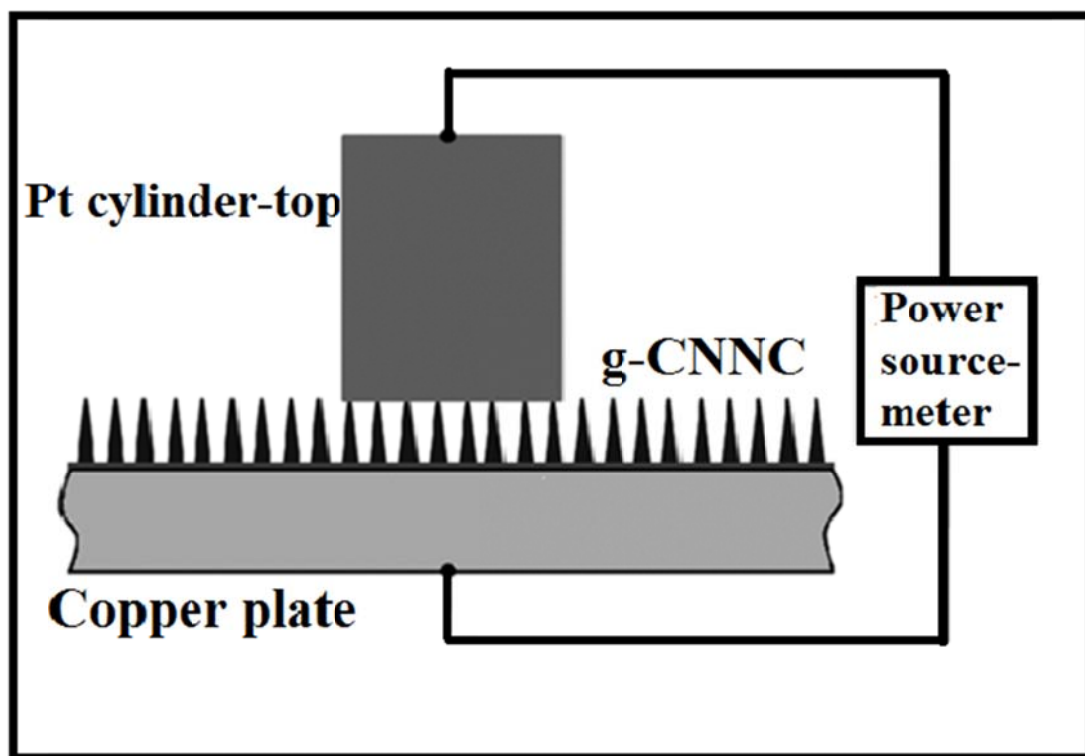

Fig. S4

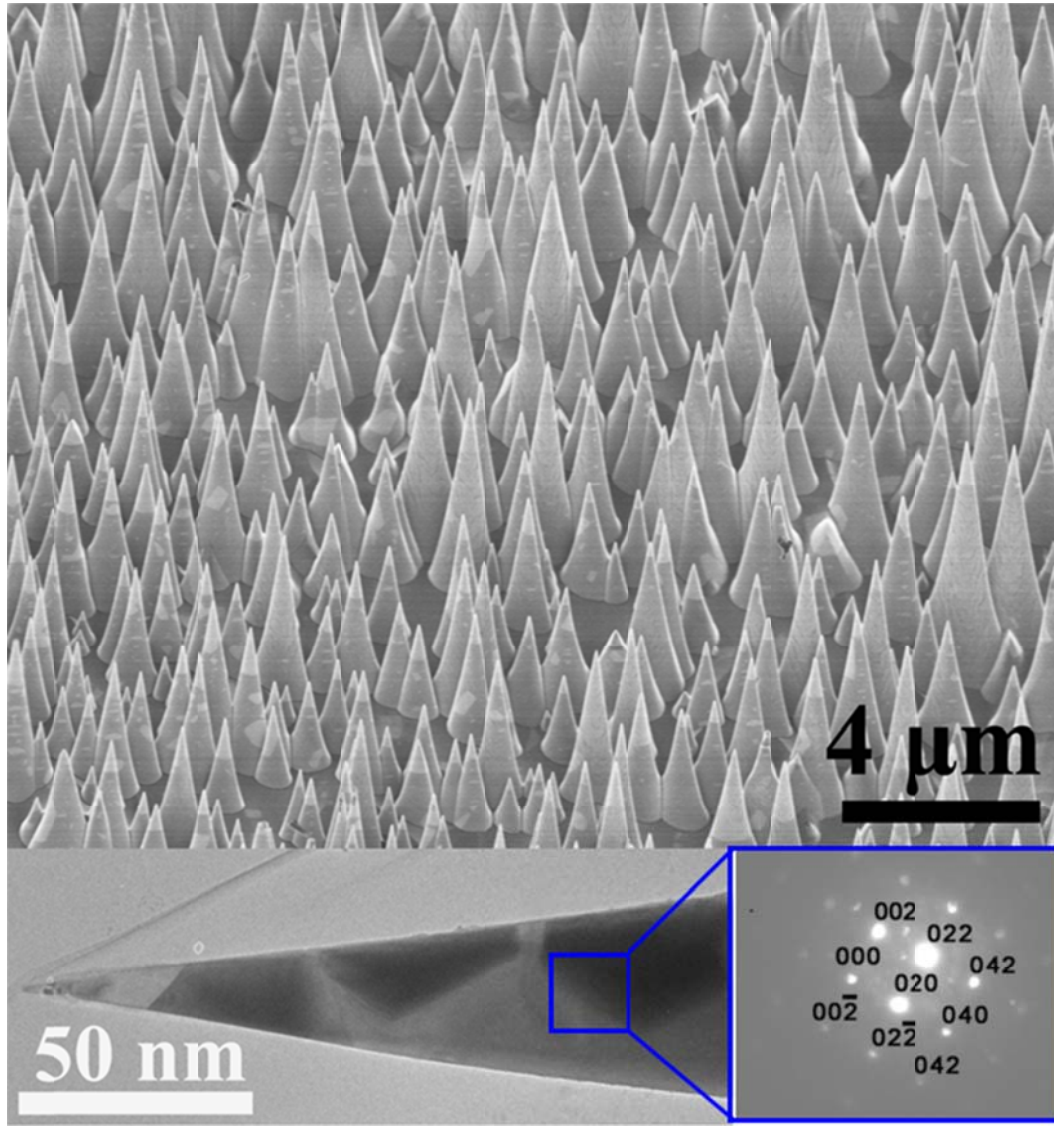

Fig. S5

**Table S1- The Electrical testing results and related information.**

| Type                                     | Test radius (m)      | Density (m <sup>-2</sup> ) | h (nm)              | r <sub>1</sub> (nm) | r <sub>2</sub> (nm) | R <sub>test</sub> (Ω.m) | R <sub>norm</sub> (Ω.m) |
|------------------------------------------|----------------------|----------------------------|---------------------|---------------------|---------------------|-------------------------|-------------------------|
| Si nanocone                              | 0.5×10 <sup>-3</sup> | 5.6×10 <sup>11</sup>       | 2.5×10 <sup>3</sup> | 20                  | 500                 | 4.42×10 <sup>3</sup>    | 4×10 <sup>3</sup>       |
| g-C <sub>3</sub> N <sub>4</sub> nanocone | 0.5×10 <sup>-3</sup> | 2.4×10 <sup>11</sup>       | 4×10 <sup>3</sup>   | 25                  | 625                 | 3.32                    | —                       |
